# Supplementary material
Source: Springer Nature journal article supplement (https://www.springermedizin.de/resource/supplementary/13075_2009_3035_MOESM2_ESM.pdf/9693384)

**A-**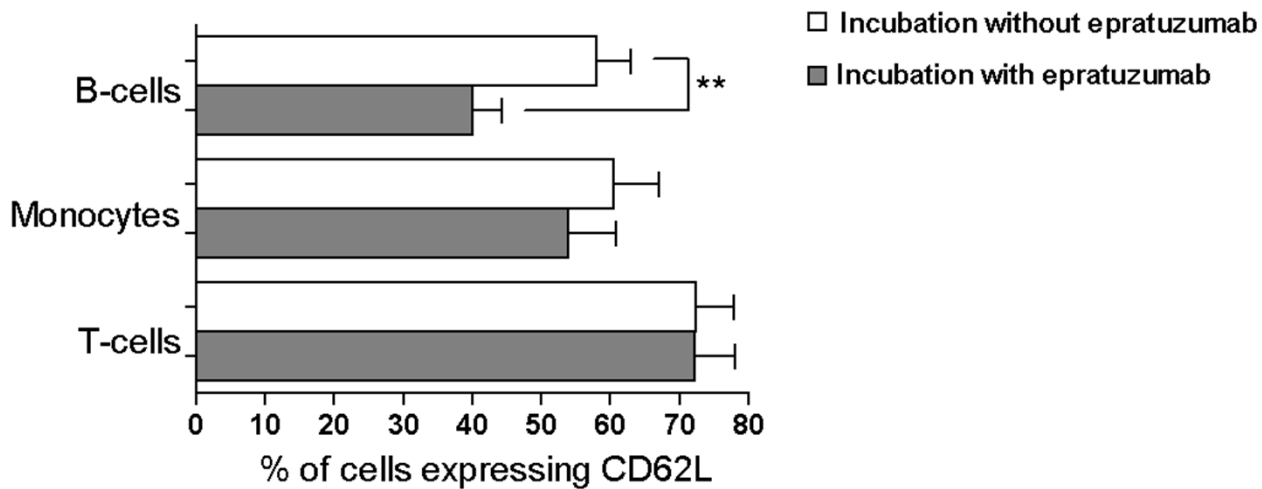**B-**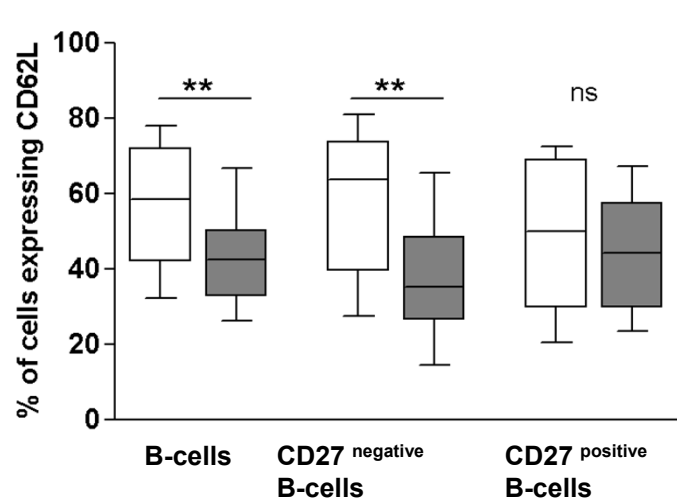**C-**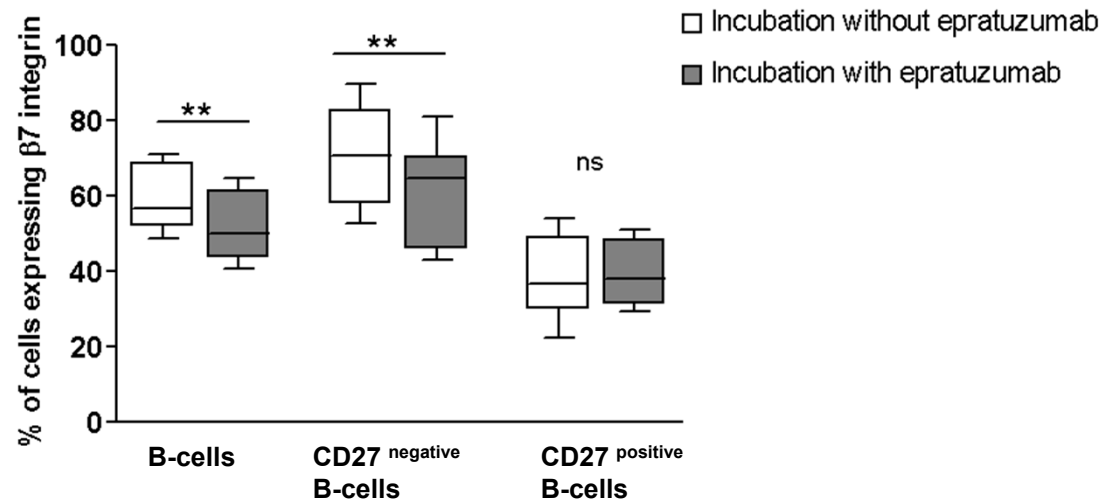

Supplement: MOESM2 [file 9693384]
